# Supplementary material for: SEC23A Is an Independent Prognostic Biomarker in Bladder Cancer Correlated With MAPK Signaling
Source: Front Genet. 2021 Aug 11;12:672832. doi: 10.3389/fgene.2021.672832 (PMC8385657; doi:10.3389/fgene.2021.672832)
Supplement: Supplementary file 5 [file Table_2.XLSX]

## Sheet: Sheet1
Correlation analysis of RNAss and sec23a.				Correlation analysis of DNAss and sec23a.
CancerType	R	P		CancerType	R	P
ACC	0.266126	0.0187745		ACC	0.0169324	0.882834
BLCA	-0.288135	4.31008e-09		BLCA	-0.208508	2.49546e-05
BRCA	-0.314526	0		BRCA	-0.0590844	0.0993722
CESC	-0.291929	2.60857e-07		CESC	-0.0591622	0.304483
CHOL	-0.467439	0.00442764		CHOL	0.258945	0.127118
COAD	-0.126803	0.00763946		COAD	-0.1787	0.00232453
DLBC	-0.246852	0.0908282		DLBC	0.0486322	0.742057
ESCA	-0.239406	0.00235282		ESCA	-0.128724	0.104715
GBM	-0.16297	0.0360141		GBM	-0.199117	0.11758
HNSC	-0.401061	0		HNSC	-0.033334	0.458732
KICH	-0.388233	0.00164322		KICH	-0.0702381	0.580417
KIRC	-0.197968	6.39248e-06		KIRC	0.0461271	0.417376
KIRP	0.114752	0.0534363		KIRP	-0.119909	0.0490839
LAML	0.137026	0.100251		LAML	0.128576	0.1193
LGG	0.150143	0.000578575		LGG	-0.011559	0.791927
LIHC	-0.149625	0.00395039		LIHC	0.143652	0.00567292
LUAD	0.115542	0.0091097		LUAD	0.129494	0.00580779
LUSC	-0.232819	2.27076e-07		LUSC	-0.120621	0.0215777
MESO	-0.182867	0.0919354		MESO	0.130355	0.231109
OV	-0.350024	6.38435e-09		OV	-0.214286	0.661508
PAAD	-0.379653	1.23713e-06		PAAD	-0.0690237	0.391484
PCPG	-0.0460312	0.536859		PCPG	0.0563524	0.449532
PRAD	-0.620746	0		PRAD	0.0677487	0.133413
READ	-0.169183	0.0348512		READ	-0.0332117	0.750247
SARC	-0.0387452	0.535306		SARC	-0.0329923	0.597612
SKCM	-0.00353603	0.938969		SKCM	0.0526128	0.254356
STAD	-0.3817	6.60332e-14		STAD	-0.180874	0.000881655
TGCT	-0.242087	0.00246674		TGCT	-0.00723792	0.92871
THCA	-0.39958	0		THCA	0.314273	6.44254e-13
THYM	-0.397607	9.00412e-06		THYM	0.139218	0.130915
UCEC	0.0790408	0.0698373		UCEC	-0.0844589	0.0853369
UCS	-0.448872	0.00059159		UCS	-0.0298701	0.826644
UVM	-0.103118	0.361963		UVM	0.0493436	0.663197
